# Supplementary material for: “Life Starts at Less than Zero”: Trauma and Coping among Iraqi and Syrian Refugees
Source: Preprints.org preprint supplement (doi:10.20944/preprints202310.1720.v2), 2023-11-08
Supplement: Supplementary file 1 [file supplementary]

“Life Starts at Less than Zero”: Trauma and Coping among Iraqi and Syrian Refugees

Bediha Ipekci, PhD*

Boston Medical Center & Boston University School of Medicine, The Department of Psychiatry

Address: 720 Harrison Avenue, 8th Floor Boston, MA 02118, Boston, MA, USA 02118

**Acknowledgments**

I would like to express my special thanks to Drs. Rosalyn Negron, Usha Tummala-Narra, and Amy Cook for providing me support at various stages of this study. I also extend my sincere gratitude and appreciation to the participants of this study.

**Funding**

The author disclosed receipt of the following financial support for the research, authorship, and/or publication of this article: This manuscript was supported by the Social Science Research Council Transdisciplinary Dissertation Development Program, University of Massachusetts Boston (recipient B. Ipekci).
